# Supplementary material for: High yield synthesis of nano-size g-C3N4 derivatives by a dissolve-regrowth method with enhanced photocatalytic ability
Source: Royal Society of Chemistry journal article supplement (doi:10.1039/c5ra01206f), 2015-01-01
Supplement: c5ra01206f1.pdf [file c5ra01206f1.pdf]

## Supporting Information

### High yield synthesis of nano-size g-C<sub>3</sub>N<sub>4</sub> derivatives by dissolve-regrowth method with enhanced photocatalytic ability

Yuanguo Xu,<sup>a</sup> Meng Xie,<sup>b</sup> Shuquan Huang,<sup>a</sup> Hui Xu\*,<sup>a</sup> Haiyan Ji,<sup>c</sup> Jiexiang Xia,<sup>a</sup> Yeping Li,<sup>b</sup> Huaming Li\*<sup>a</sup>

<sup>a</sup>*School of Chemistry and Chemical Engineering, Jiangsu University, 301 Xuefu Road, Zhenjiang, 212013, P R China*

<sup>b</sup>*School of Pharmacy, Jiangsu University, 301 Xuefu Road, Zhenjiang, 212013, P R China*

<sup>c</sup>*School of Chemistry and Chemical Engineering, 301 Xuefu Road, Zhenjiang, 212013, P R China*

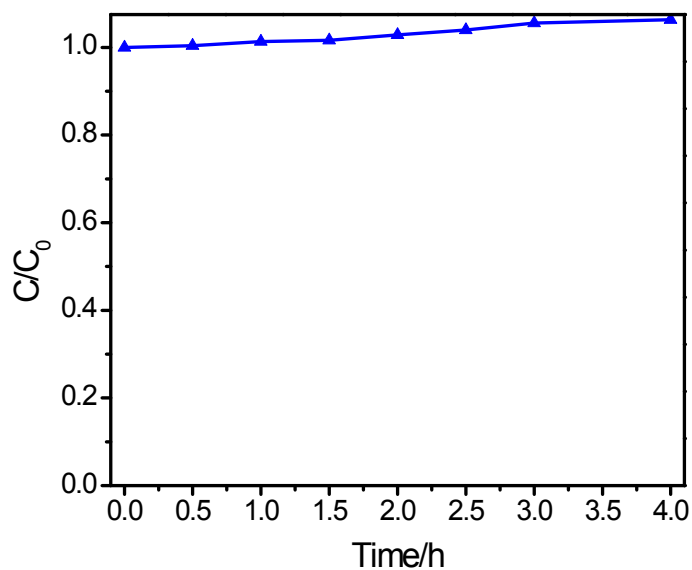

Fig. S1 The photolysis of MO under visible light irradiation without photocatalyst.

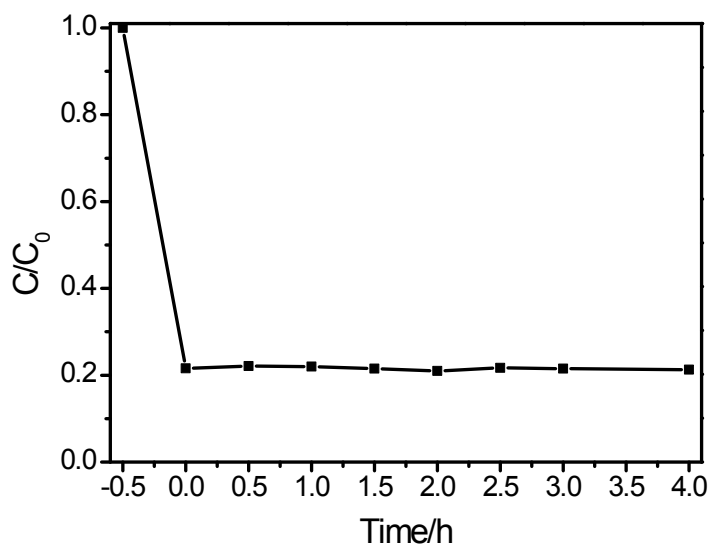

Fig. S2 The photocatalytic of nano-size g-C<sub>3</sub>N<sub>4</sub>-HNO<sub>3</sub> under visible light irradiation.

The g-C<sub>3</sub>N<sub>4</sub>-HNO<sub>3</sub> shows a good adsorptivity, it can adsorb about 78 % of the MO in 0.5 h, but it almost has no photoactivity even the irradiation time reach 4 h. The surface of the samples still shows the orange color, which come from the adsorbed MO dye.
